# Supplementary material for: Development of Cyanine 813@Imidazole-Based Doped Supported Devices for Divalent Metal Ions Detection
Source: MDPI journal article supplement (doi:10.3390/chemosensors10020080), 2022-02-14
Supplement: s1 [file s1]

## Supplementary Material

### Development of Cyanine 813@imidazole-based Doped Supported Devices for Divalent Metal Ions Detection

Joana Galhano <sup>1</sup>, Gonalo A. Marcelo <sup>1</sup>, Hugo M. Santos <sup>1,2</sup>, Jos  Luis Capelo-Mart nez <sup>1,2</sup>, Carlos Lodeiro <sup>1,2</sup> and Elisabete Oliveira <sup>1,2,\*</sup>

<sup>1</sup>BIOSCOPE Research Group, LAQV-REQUIMTE, Chemistry Department, NOVA School of Science and Technology, FCT-NOVA, Universidade NOVA de Lisboa, 2829-516 Caparica, Portugal; j.galhano@campus.fct.unl.pt (J. G.); goncalo.marcelo9@gmail.com (G. A. M.); hmsantos@fct.unl.pt (H. M. S.); jlcm@fct.unl.pt (J.C.); cle@fct.unl.pt (C. L.); ej.oliveira@fct.unl.pt (E. O)

<sup>2</sup>PROTEOMASS Scientific Society, Rua dos Inventores, Madam Parque, Caparica Campus, Portugal;

\*Correspondence: ej.oliveira@fct.unl.pt

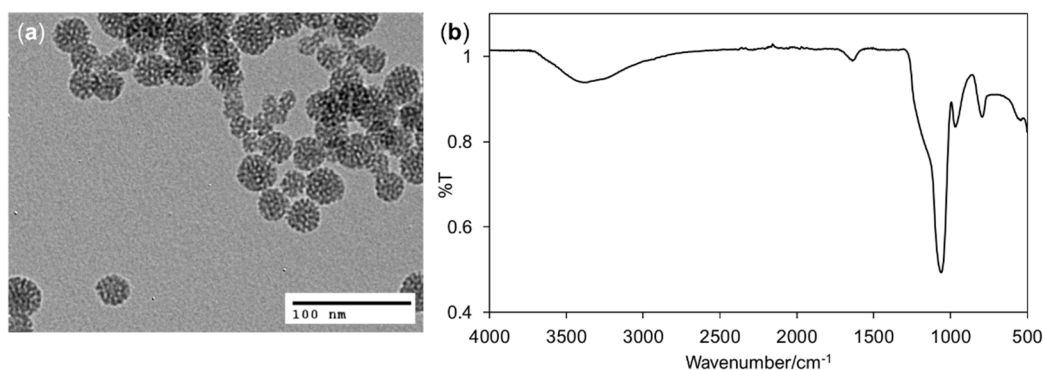

**Figure S1.** Mesoporous silica nanoparticle Characterization. (A) – TEM image of MNs, (B) – FT-IR spectra of MNs.

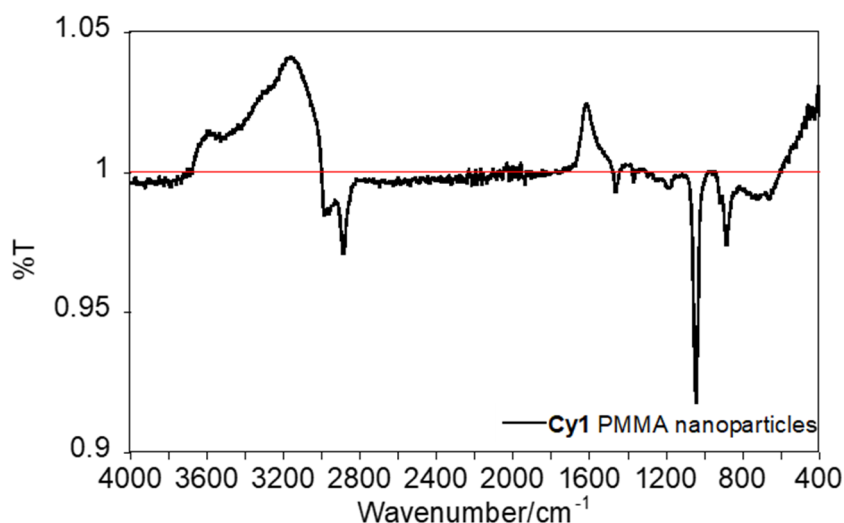

**Figure S2.** FTIR spectra, after water subtraction, of the aqueous suspension of **Cy1**-doped PMMA nanoparticles, acquired with 500  $\mu$ M CTAB.

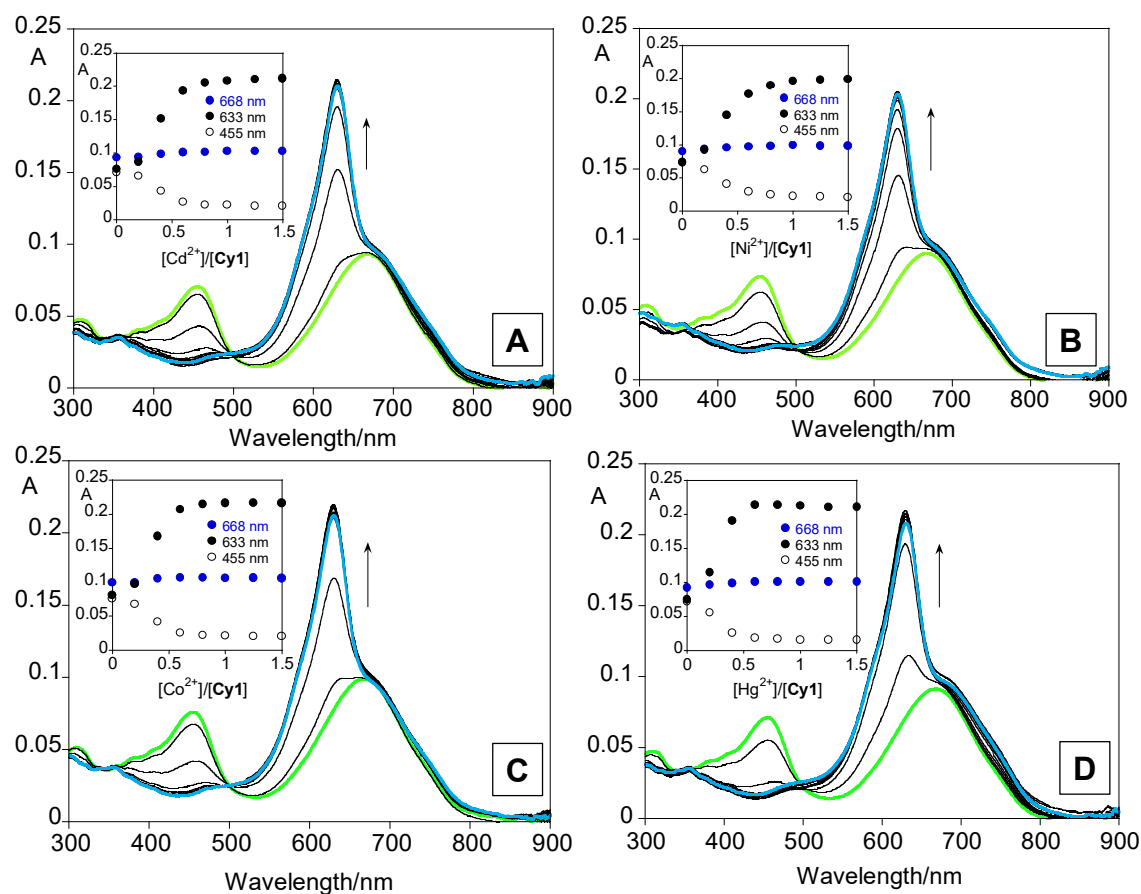

**Figure S3.** Spectrophotometric titrations of dye Cy1 with the addition of  $\text{Cd}^{2+}$  (A),  $\text{Ni}^{2+}$  (B),  $\text{Co}^{2+}$  (C) and  $\text{Hg}^{2+}$  (D) in acetonitrile. The inset (A to D) represents the absorption at 455 nm, 633 nm and 668 nm, as function of  $[\text{Cd}^{2+}]/[\text{Cy1}]$ ,  $[\text{Ni}^{2+}]/[\text{Cy1}]$ ,  $[\text{Co}^{2+}]/[\text{Cy1}]$  and  $[\text{Hg}^{2+}]/[\text{Cy1}]$ , respectively. ( $[\text{Cy1}] = 5.8 \times 10^{-6} \text{ M}$ ,  $\lambda_{\text{exc}} = 668 \text{ nm}$ ,  $T = 295 \text{ K}$ ).

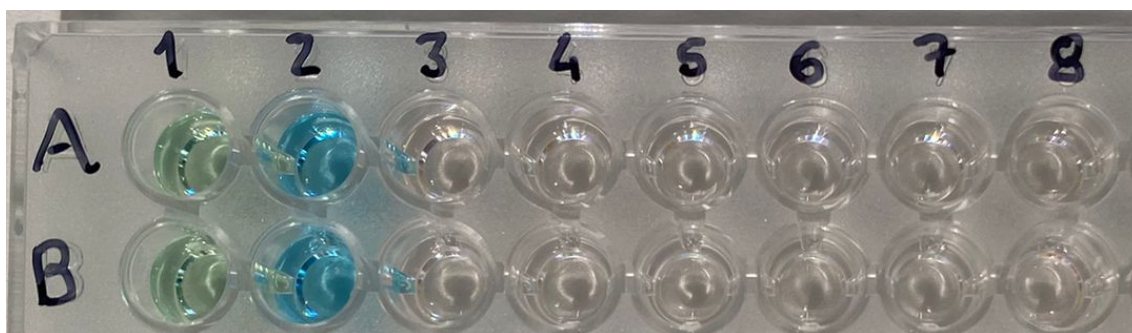

**Figure S4.** Naked-eye assessment of the colourimetric selectivity of **Cy1** ( $1 \times 10^{-5} \text{M}$ ) for  $\text{Cu}^{2+}$  metal ions (0.5 equivalents) upon the addition of other metal ions (1 equivalent) in acetonitrile. 1 – **Cy1**, 2 – **Cy1** +  $\text{M}^{n+}$  ( $\text{Zn}^{2+}$ ,  $\text{Cd}^{2+}$ ,  $\text{Co}^{2+}$ ,  $\text{Ni}^{2+}$  and  $\text{Hg}^{2+}$ ), 3 – **Cy1** +  $\text{Cu}^{2+}$ , 4 – **Cy1** +  $\text{Cu}^{2+}$  +  $\text{Zn}^{2+}$ , 5 – **Cy1** +  $\text{Cu}^{2+}$  +  $\text{Cd}^{2+}$ , 6 – **Cy1** +  $\text{Cu}^{2+}$  +  $\text{Co}^{2+}$ , 7 – **Cy1** +  $\text{Cu}^{2+}$  +  $\text{Ni}^{2+}$ , 8 – **Cy1** +  $\text{Cu}^{2+}$  +  $\text{Hg}^{2+}$ . A and B are duplicates.

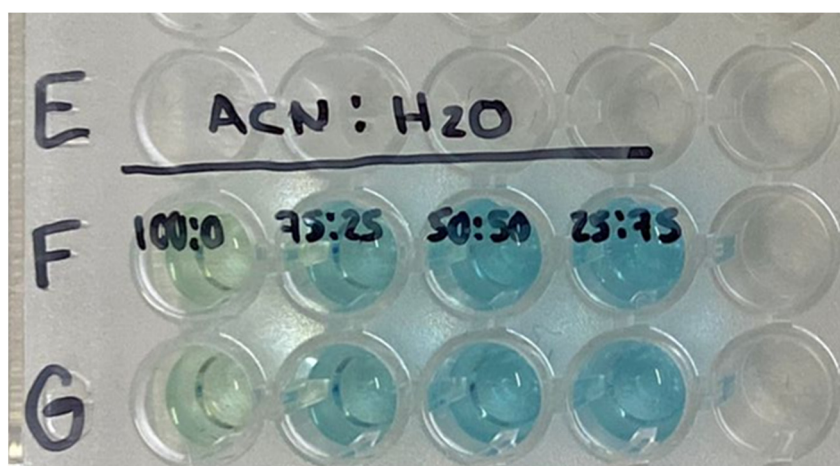

**Figure S5.** Naked-eye assessment of **Cy1** ( $1 \times 10^{-5} \text{M}$ ) in different ratios of acetonitrile (ACN) and water ( $\text{H}_2\text{O}$ ). F and G are duplicates.

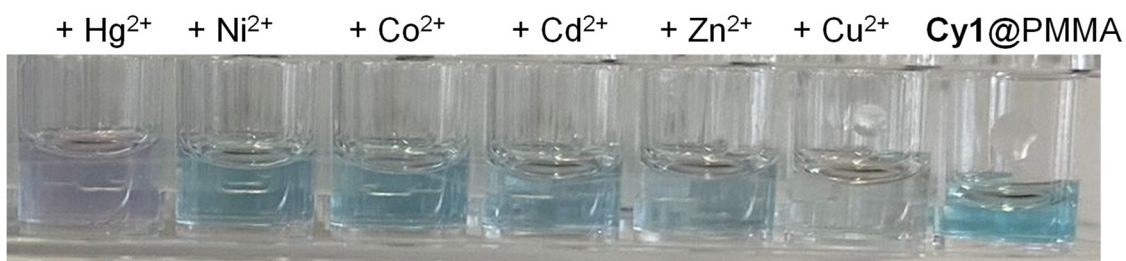

**Figure S6.** Naked-eye image of **Cy1@PMMA** nanoparticles upon the addition of 20 equivalents of the metal ions in water.

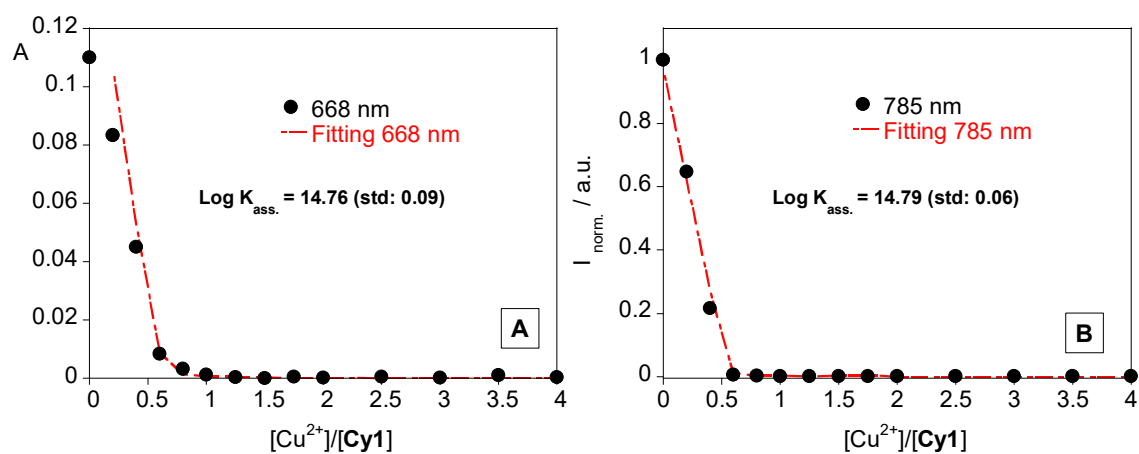

**Figure S7** - Absorption (A) at 668 nm and emission (B) at 785 nm in acetonitrile, with the fitting determined by HypSpec Program, as function of  $[\text{Cu}^{2+}]/[\text{Cy1}]$  (A, B).  $[\text{Cy1}] = 5.8 \times 10^{-6} \text{ M}$ ,  $\lambda_{\text{exc}}=668 \text{ nm}$ ,  $T = 295 \text{ K}$ ).
